# Supplementary material for: A heavy atom-free copolymer for light triggered photodynamic and photothermal therapy of human prostate cancer cells
Source: Royal Society of Chemistry journal article supplement (doi:10.1039/c9nj00941h), 2019-01-01
Supplement: c9nj00941h1.pdf [file c9nj00941h1.pdf]

## A heavy atom free copolymer for light triggered photodynamic and photothermal therapy of human prostate cancer cells

Jian Shen<sup>a</sup>, Zhen Ke<sup>b</sup>, Jianjiao Chen<sup>b</sup>, Zhenyuan Zou<sup>b</sup>, Liguang Sun<sup>a\*</sup>, Dengfeng Zou<sup>b\*</sup>

*a. Department of Urology, Changshu No. 2 people's Hospital, 215500, Jiangsu, P.R. China Email: 13338729262@163.com*

*b. School of Pharmacy, Guilin Medical University, Guilin 541004, Guangxi, P.R. China, Email: zdf1226@126.com*

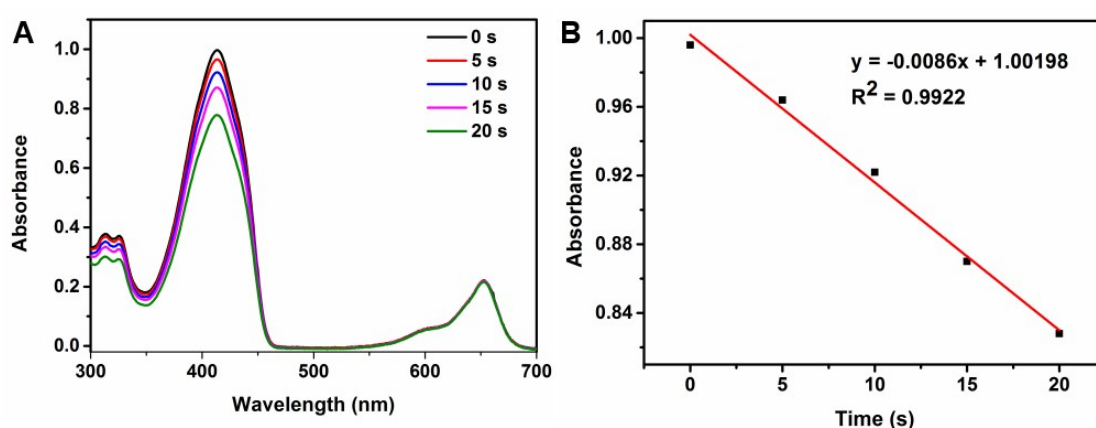

Figure S1 A DPBF degradation of MB under irradiation; B Linear fitting of the absorbance

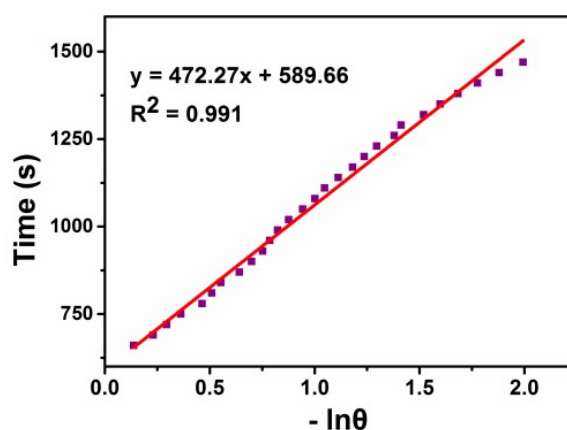

Figure S2 Linear fitting of  $\ln\theta$  and time
